# Supplementary material
Source: HighWire-hosted journal article supplement (https://bmjopen.bmj.com/content/13/7/e067914)
Supplement: inline-supplementary-material-1 [file inline-supplementary-material-1.pdf]

Graduated Supervised Weight Resistance Exercise Chart & Walking Exercise Chart **WEEK 1**

| No | Date | Position | Adjunct                                                                                                   | Type                                 | Weight                                                                                                                                                                                | Amount (Reps & Set) | VAS | RPE | Exercise Prescription | Duration | BORG |
|----|------|----------|-----------------------------------------------------------------------------------------------------------|--------------------------------------|---------------------------------------------------------------------------------------------------------------------------------------------------------------------------------------|---------------------|-----|-----|-----------------------|----------|------|
| 1  |      | Sit      | PVC bar <input type="checkbox"/><br>Dumbbell <input type="checkbox"/><br>Sandbag <input type="checkbox"/> | Front Raise <input type="checkbox"/> | 500g <input type="checkbox"/> 600g <input type="checkbox"/> 700g <input type="checkbox"/><br>800g <input type="checkbox"/> 900g <input type="checkbox"/> 1kg <input type="checkbox"/> |                     |     |     |                       |          |      |
|    |      |          |                                                                                                           | Biceps Curl <input type="checkbox"/> | 500g <input type="checkbox"/> 600g <input type="checkbox"/> 700g <input type="checkbox"/><br>800g <input type="checkbox"/> 900g <input type="checkbox"/> 1kg <input type="checkbox"/> |                     |     |     |                       |          |      |
| 2  |      | Sit      | PVC bar <input type="checkbox"/><br>Dumbbell <input type="checkbox"/><br>Sandbag <input type="checkbox"/> | Front Raise <input type="checkbox"/> | 500g <input type="checkbox"/> 600g <input type="checkbox"/> 700g <input type="checkbox"/><br>800g <input type="checkbox"/> 900g <input type="checkbox"/> 1kg <input type="checkbox"/> |                     |     |     |                       |          |      |
|    |      |          |                                                                                                           | Biceps Curl <input type="checkbox"/> | 500g <input type="checkbox"/> 600g <input type="checkbox"/> 700g <input type="checkbox"/><br>800g <input type="checkbox"/> 900g <input type="checkbox"/> 1kg <input type="checkbox"/> |                     |     |     |                       |          |      |
| 3  |      | Sit      | PVC bar <input type="checkbox"/><br>Dumbbell <input type="checkbox"/><br>Sandbag <input type="checkbox"/> | Front Raise <input type="checkbox"/> | 500g <input type="checkbox"/> 600g <input type="checkbox"/> 700g <input type="checkbox"/><br>800g <input type="checkbox"/> 900g <input type="checkbox"/> 1kg <input type="checkbox"/> |                     |     |     |                       |          |      |
|    |      |          |                                                                                                           | Biceps Curl <input type="checkbox"/> | 500g <input type="checkbox"/> 600g <input type="checkbox"/> 700g <input type="checkbox"/><br>800g <input type="checkbox"/> 900g <input type="checkbox"/> 1kg <input type="checkbox"/> |                     |     |     |                       |          |      |
| 4  |      | Sit      | PVC bar <input type="checkbox"/><br>Dumbbell <input type="checkbox"/><br>Sandbag <input type="checkbox"/> | Front Raise <input type="checkbox"/> | 500g <input type="checkbox"/> 600g <input type="checkbox"/> 700g <input type="checkbox"/><br>800g <input type="checkbox"/> 900g <input type="checkbox"/> 1kg <input type="checkbox"/> |                     |     |     |                       |          |      |
|    |      |          |                                                                                                           | Biceps Curl <input type="checkbox"/> | 500g <input type="checkbox"/> 600g <input type="checkbox"/> 700g <input type="checkbox"/><br>800g <input type="checkbox"/> 900g <input type="checkbox"/> 1kg <input type="checkbox"/> |                     |     |     |                       |          |      |
| 5  |      | Sit      | PVC bar <input type="checkbox"/><br>Dumbbell <input type="checkbox"/><br>Sandbag <input type="checkbox"/> | Front Raise <input type="checkbox"/> | 500g <input type="checkbox"/> 600g <input type="checkbox"/> 700g <input type="checkbox"/><br>800g <input type="checkbox"/> 900g <input type="checkbox"/> 1kg <input type="checkbox"/> |                     |     |     |                       |          |      |
|    |      |          |                                                                                                           | Biceps Curl <input type="checkbox"/> | 500g <input type="checkbox"/> 600g <input type="checkbox"/> 700g <input type="checkbox"/><br>800g <input type="checkbox"/> 900g <input type="checkbox"/> 1kg <input type="checkbox"/> |                     |     |     |                       |          |      |
| 6  |      | Sit      | PVC bar <input type="checkbox"/><br>Dumbbell <input type="checkbox"/><br>Sandbag <input type="checkbox"/> | Front Raise <input type="checkbox"/> | 500g <input type="checkbox"/> 600g <input type="checkbox"/> 700g <input type="checkbox"/><br>800g <input type="checkbox"/> 900g <input type="checkbox"/> 1kg <input type="checkbox"/> |                     |     |     |                       |          |      |
|    |      |          |                                                                                                           | Biceps Curl <input type="checkbox"/> | 500g <input type="checkbox"/> 600g <input type="checkbox"/> 700g <input type="checkbox"/><br>800g <input type="checkbox"/> 900g <input type="checkbox"/> 1kg <input type="checkbox"/> |                     |     |     |                       |          |      |
| 7  |      | Sit      | PVC bar <input type="checkbox"/><br>Dumbbell <input type="checkbox"/><br>Sandbag <input type="checkbox"/> | Front Raise <input type="checkbox"/> | 500g <input type="checkbox"/> 600g <input type="checkbox"/> 700g <input type="checkbox"/><br>800g <input type="checkbox"/> 900g <input type="checkbox"/> 1kg <input type="checkbox"/> |                     |     |     |                       |          |      |
|    |      |          |                                                                                                           | Biceps Curl <input type="checkbox"/> | 500g <input type="checkbox"/> 600g <input type="checkbox"/> 700g <input type="checkbox"/><br>800g <input type="checkbox"/> 900g <input type="checkbox"/> 1kg <input type="checkbox"/> |                     |     |     |                       |          |      |
